# Supplementary material for: Molybdenum oxide with a varied valency ratio to enable selective d-galactose epimerization to d-talose
Source: Royal Society of Chemistry journal article supplement (doi:10.1039/d4re00076e), 2024-01-01
Supplement: d4re00076e1.pdf [file d4re00076e1.pdf]

## Supporting Information

### **Molybdenum oxide with a varied valency ratio to enable a selective galactose epimerization to talose**

Bhawana Devi,<sup>1,2</sup> Senthil Murugan Arumugam,<sup>1</sup> Ravi Kumar Kunchala,<sup>1</sup> Paramdeep Kaur,<sup>1,3</sup> Sangeeta Mahala,<sup>1,2</sup> and Sasikumar Elumalai<sup>1,\*</sup>

<sup>1</sup> *Chemical Engineering Division, DBT-Center of Innovative and Applied Bioprocessing, Mohali, Punjab 140306 India*

<sup>2</sup> *Department of Chemical Sciences, Indian Institute of Science Education and Research (IISER), Mohali, Punjab 140306 India*

<sup>3</sup> *Agri-Biotechnology Division, DBT-National Agri-Food Biotechnology Institute, Mohali, Punjab 140306 India*

\* Corresponding author E-mail: [sasikumar@ciab.res.in](mailto:sasikumar@ciab.res.in) (S. Elumalai); Tel: +91-172-5221-444

Total pages: 14

Total Figures: 17

Total Tables: 2

## Experimental

### Mathematical expressions

$$\text{Galactose conversion (\%)} = \frac{(\text{Initial mass of sugar} - \text{Remaining mass of sugar after completion of reaction})}{\text{Initial mass of sugar}} \times 100$$

----- (S1)

$$\text{Product yield (\%)} = \frac{\text{Obtained mass of product}}{\text{Initial mass of Galactose}} \times 100$$

----- (S2)

$$\text{Product selectivity (\%)} = \frac{\text{Mass of product}}{\text{Converted mass of Galactose}} \times 100$$

----- (S3)

### Analytical characterization

$$D = \frac{K\lambda}{\beta \cos\theta}$$

----- (S4)

Where, D is crystallite size (nm), K is shape factor (0.9),  $\lambda$  is wavelength of Cu-K $\alpha$  radiation (1.5406Å),  $\beta$  is full width at half maximum (FWHM) intensity, and  $\theta$  is Bragg's diffraction angle. The crystallite size of MoO<sub>3</sub> and MoO<sub>3-x</sub> was observed to be ~ 68 nm and ~ 60 nm, respectively.

### First-order kinetic rate equation

$$\ln\left\{\frac{[\text{Galac}]_t}{[\text{Galac}]_0}\right\} = -k \times \text{time (sec)}$$

----- (S5)

Where, [Galac]<sub>t</sub> and [Galac]<sub>0</sub> represent the final and initial reactant (galactose) concentration at time *t*. *k* is the observed rate constant of reaction (disappearance of galactose).

The temperature dependency of the rate constant,  $k$  was determined by using the Arrhenius equation (Eqn. S6):

$$k = A_0 \times e^{\left(\frac{-E_a}{RT}\right)} \text{----- (S6)}$$

where,  $A_0$  is the frequency factor (or Arrhenius constant),  $E_a$  is the activation energy (J/mol), and  $R$  is the universal gas constant (8.31 J/mol. K).

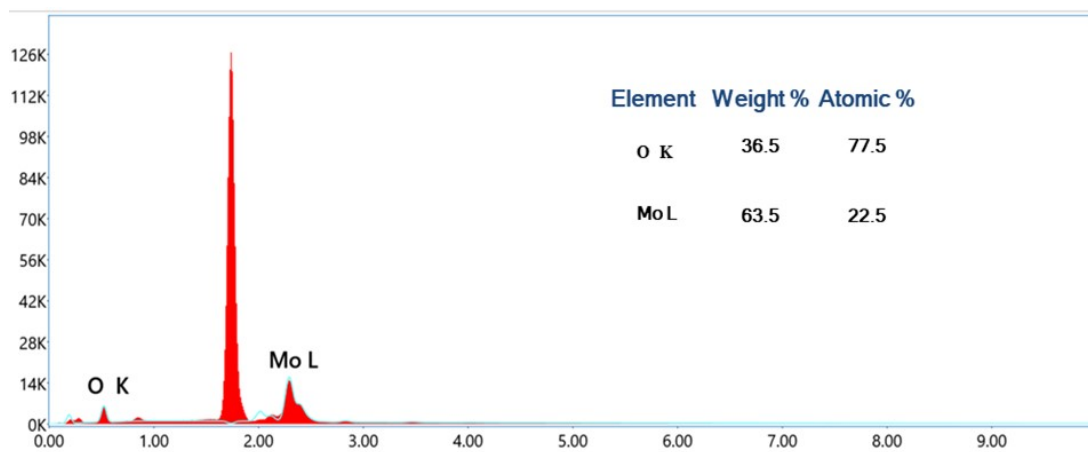

**Figure S1.** SEM-EDX result of MO-2M catalyst.

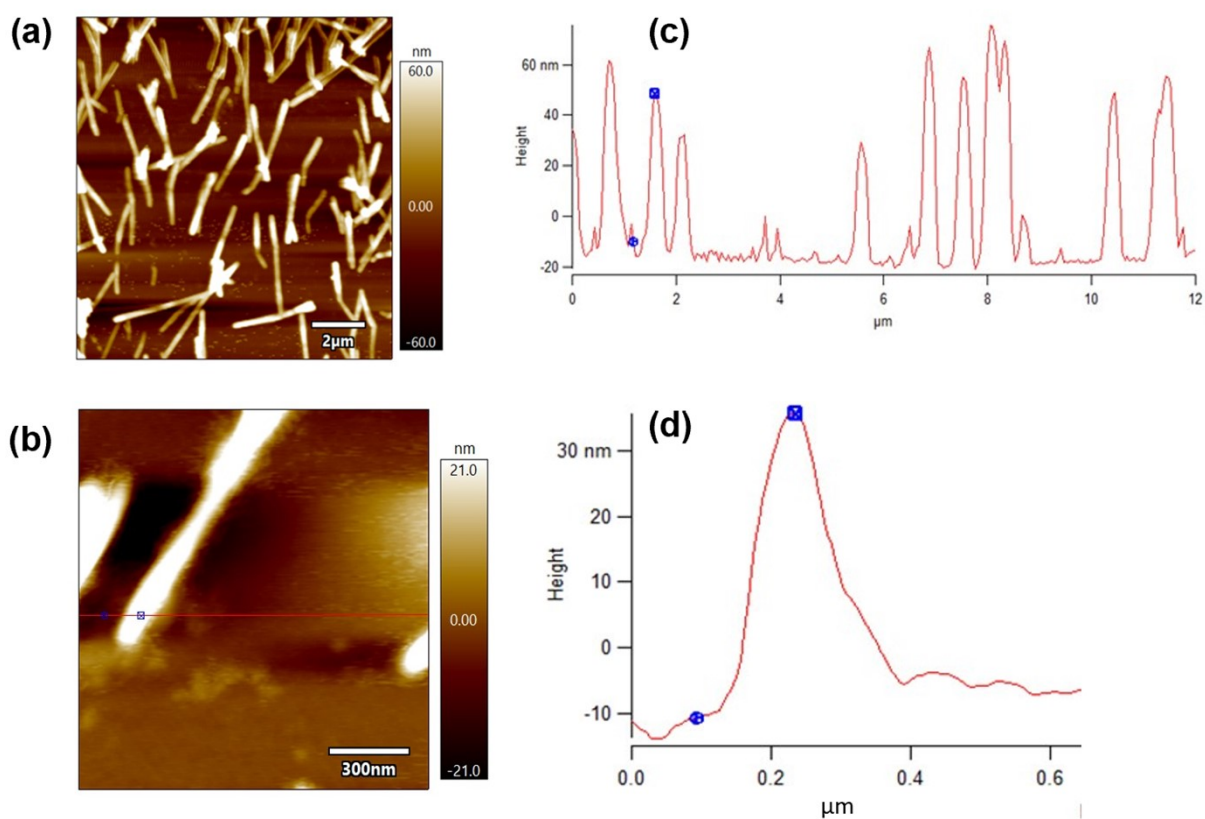

**Figure S2.** AFM analysis result of MO-2M catalyst: (a) typical AFM image, (b) magnified image of 300 nm, (c) and (d) corresponding height profiles of lines in (a) and (b), respectively.

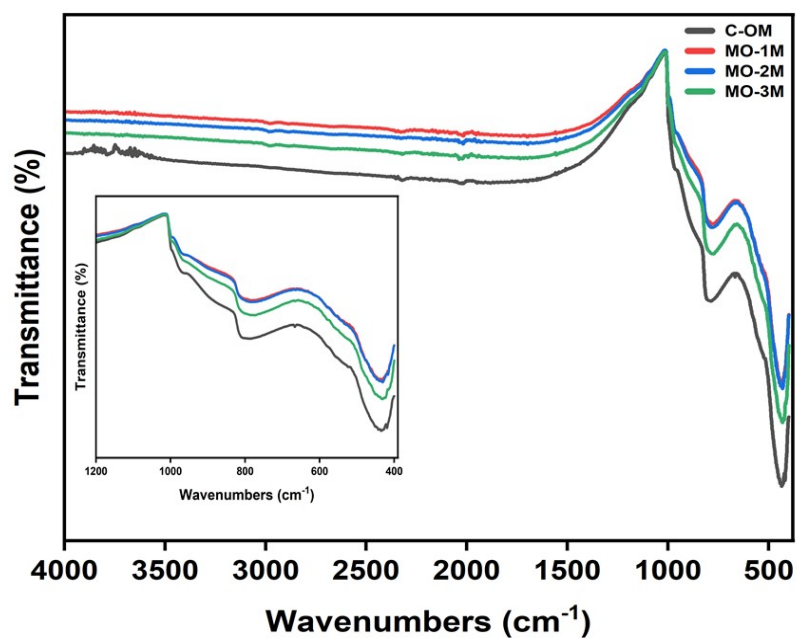

**Figure S3.** Comparative FTIR analysis result of MoO<sub>3</sub> catalysts (both pristine and acid-treated) in the 4000-400 cm<sup>-1</sup> range. Inset: scan result of the catalysts in the 1200-400 cm<sup>-1</sup> absorption range.

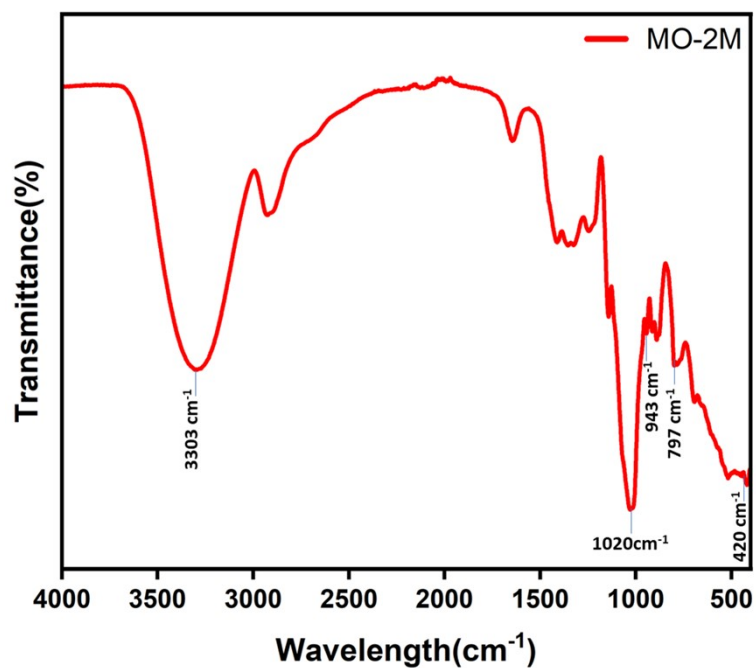

**Figure S4.** ATR-FTIR result of MO-2M catalyst.

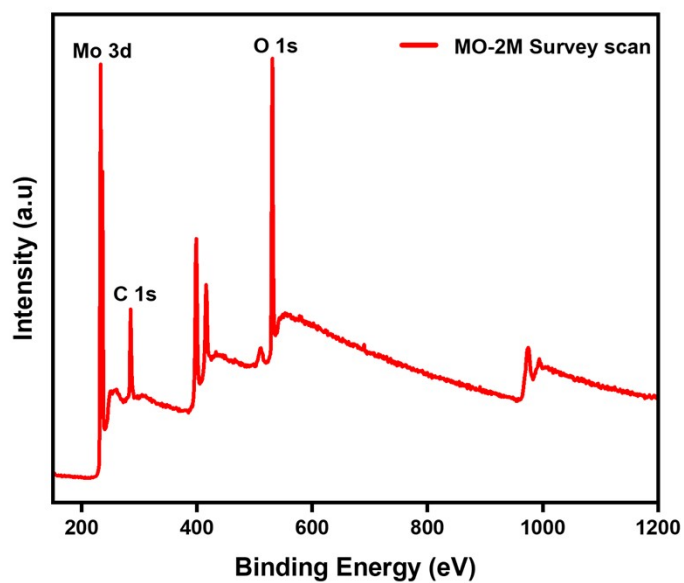

**Figure S5.** XPS survey spectrum of MO-2M catalyst.

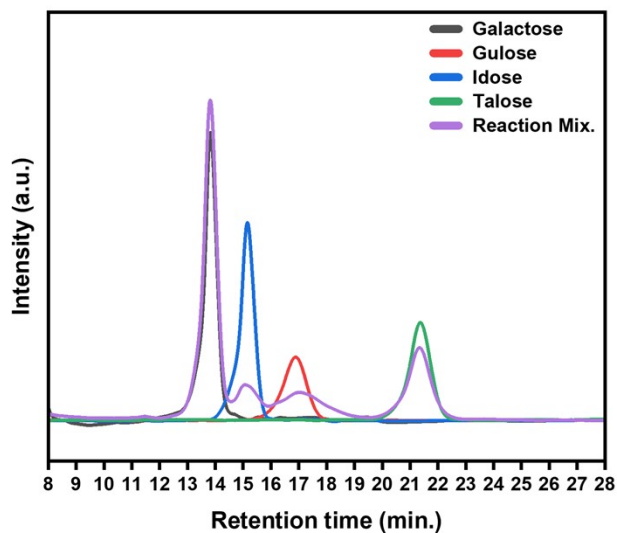

**Figure S6.** Stacked chromatogram of standard sugars vs. post-reaction mixture of galactose epimerization over commercial  $\text{MoO}_3$  in a water medium at 15% wt. catalyst load and 120 °C.

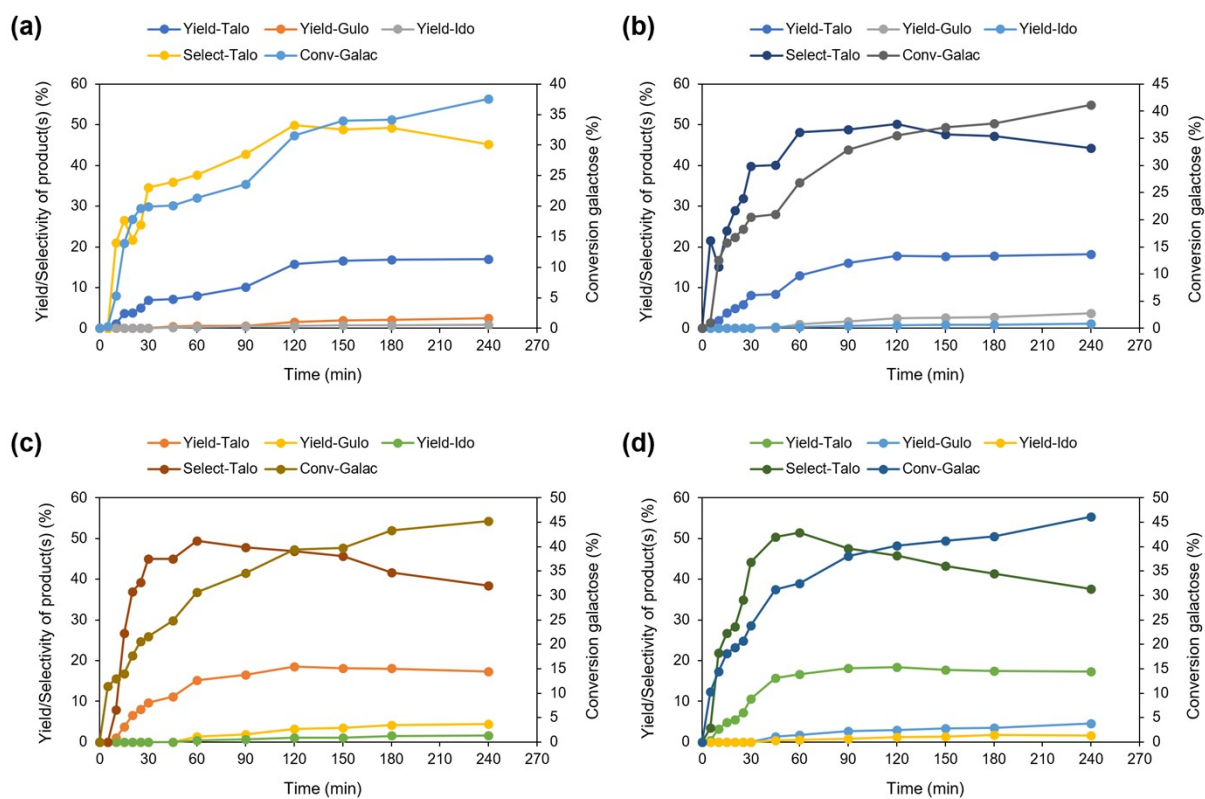

**Figure S7.** Galactose epimerization profile over commercial MoO<sub>3</sub> in a water medium under different catalyst loadings (w/w ratio of MoO<sub>3</sub> to galactose) at 90 °C: (a) 5%, (b) 10%, (c) 15% and (d) 20%.

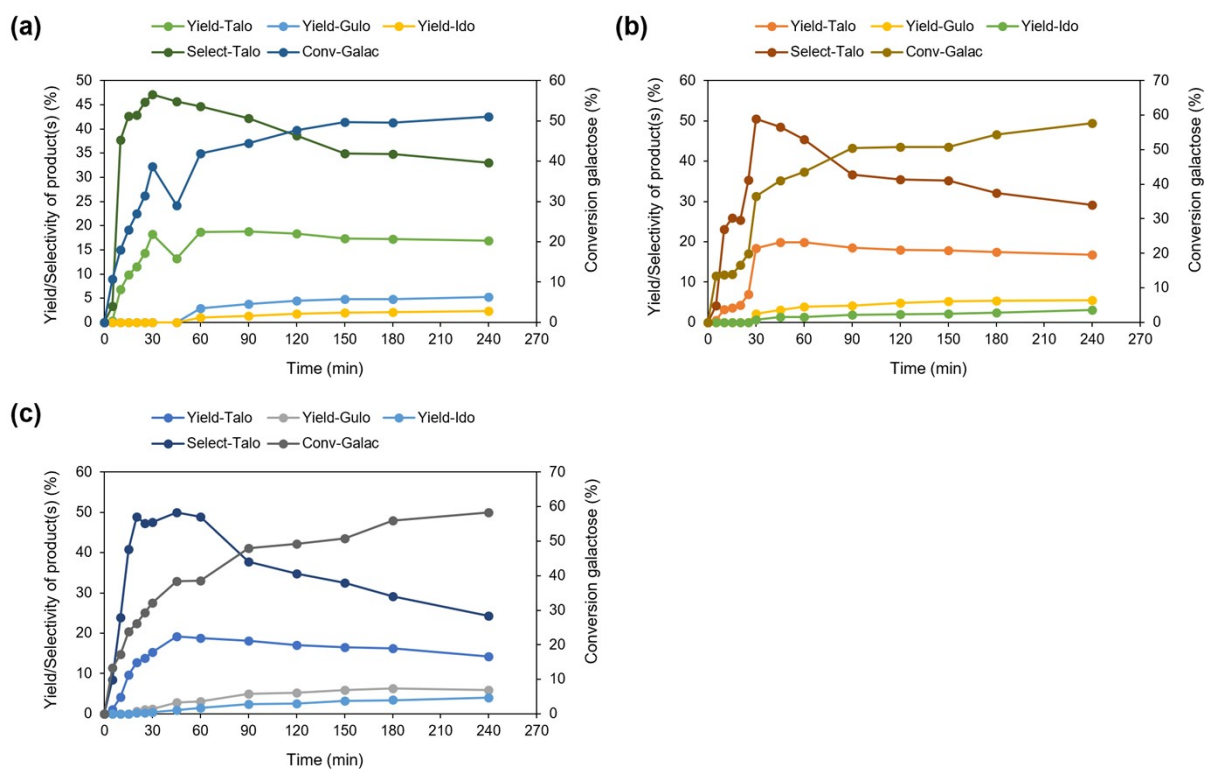

**Figure S8.** Galactose epimerization profile over commercial  $\text{MoO}_3$  in a water medium under different catalyst loadings (w/w ratio of  $\text{MoO}_3$  to galactose) at 100 °C: (a) 10%, (b) 15%, and (c) 20%.



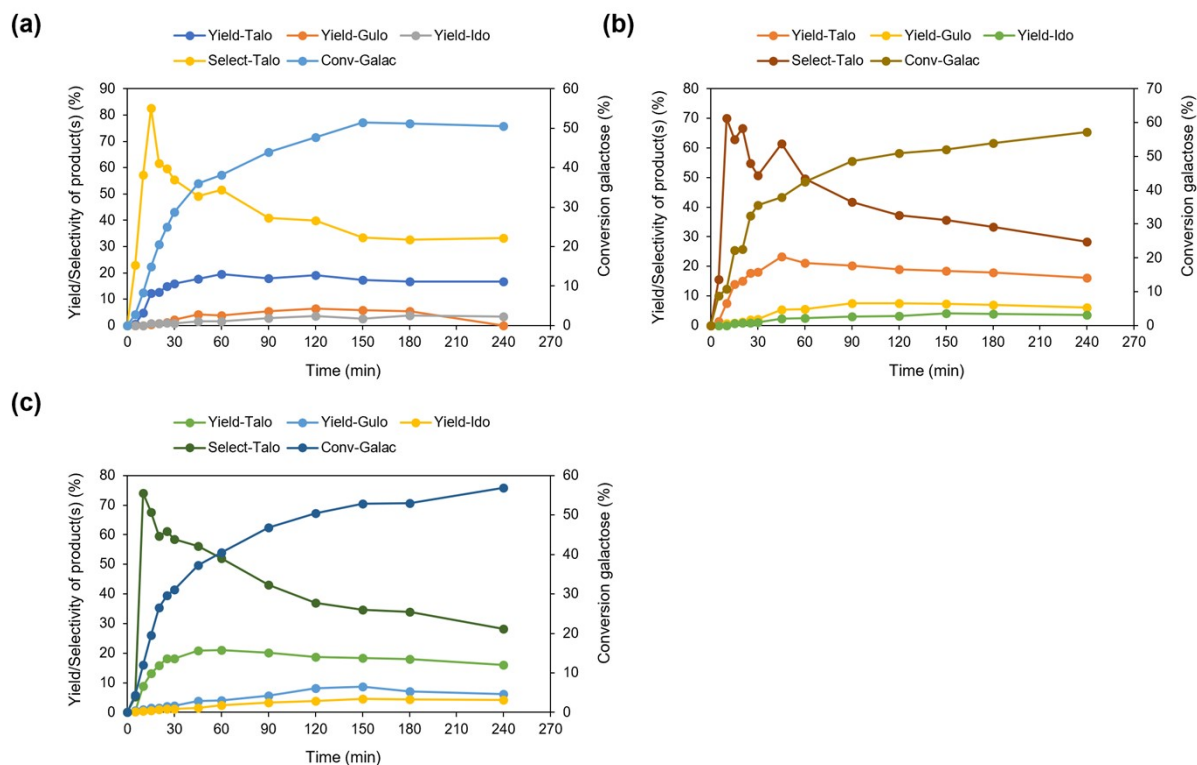

**Figure S9.** Galactose epimerization profile over commercial MoO<sub>3</sub> in a water medium under different catalyst loadings (w/w ratio of MoO<sub>3</sub> to galactose) at 110 °C: (a) 10%, (b) 15%, and (c) 20%.

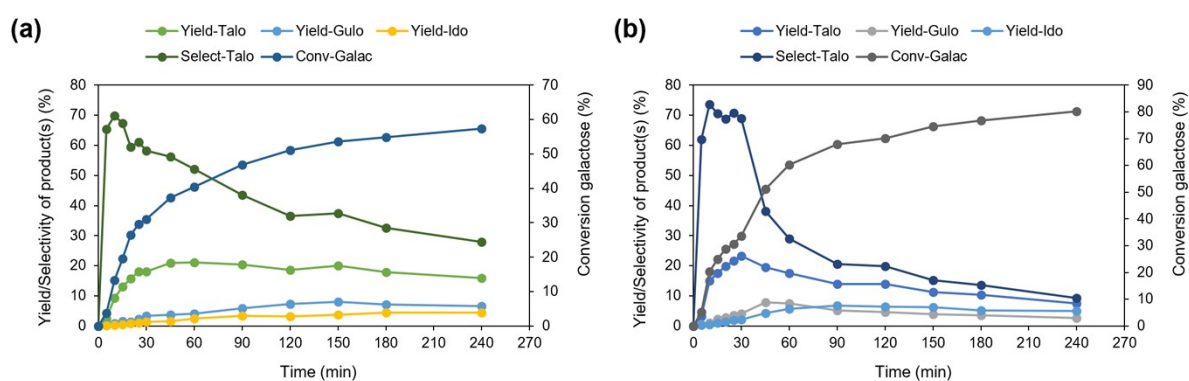

**Figure S10.** Galactose epimerization profile over commercial MoO<sub>3</sub> in a water medium at 15% wt. catalyst load on substrate under different temperature conditions: (a) 120 °C and (b) 130 °C.

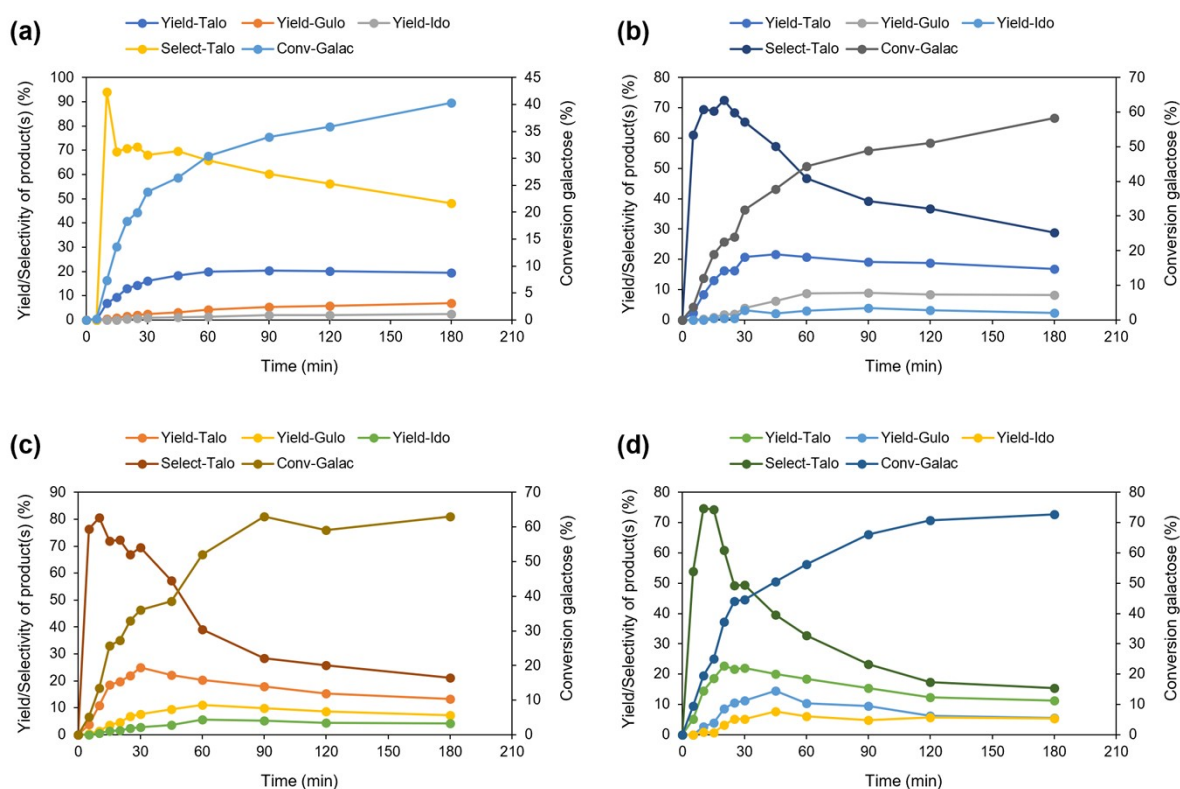

**Figure S11.** Galactose epimerization profile over acid-treated MoO<sub>3</sub> (MO-2M) in a water medium at 15% wt. catalyst load on substrate under different temperature conditions: (a) 100 °C, (b) 110 °C, (c) 120 °C and (d) 130 °C.

**Table S1.** Data of product(s) selectivity, yield and carbon balance of MO-2M catalyst under different temperature conditions.

| Reaction Temperature. (°C) | $S_{Talo}$ (%) | $Y_{Gul}$ (%) | $Y_{Ido}$ (%) | $TON$  | $TOF$    | $CB$ (%) |
|----------------------------|----------------|---------------|---------------|--------|----------|----------|
| 100                        | 68.1           | 2.4           | 0.7           | 1.0330 | 0.000573 | 82.2     |
| 110                        | 65.3           | 3.9           | 2.1           | 1.4966 | 0.000831 | 88.1     |
| 120                        | 69.5           | 7.5           | 2.7           | 1.8847 | 0.001048 | 98.0     |
| 130                        | 49.3           | 11.2          | 5.2           | 2.0456 | 0.001136 | 86.0     |

S-selectivity, Y-yield, Tal-talose, Gul-gulose, Ido-idose and CB-carbon balance. TON-turn over number is calculated as moles of reactant consumed per mole of catalyst. TOF-turn over frequency is calculated as moles of reactant consumed per mole of catalyst per unit time.

**Table S2.** Comparative data of product(s) selectivity, yield and carbon balance of MoO<sub>3</sub> catalysts (both pristine and acid-treated) under optimum conditions.

| Catalysts (MoO <sub>3</sub> ) | <i>S</i> <sub>Tal</sub> (%) | <i>Y</i> <sub>Gul</sub> (%) | <i>Y</i> <sub>Ido</sub> (%) | <i>TON</i> | <i>TOF</i> | <i>CB</i> (%) |
|-------------------------------|-----------------------------|-----------------------------|-----------------------------|------------|------------|---------------|
| CMO                           | 58.2                        | 3.4                         | 1.3                         | 1.22063    | 0.000113   | 73.6          |
| MO-1M                         | 60.4                        | 5.5                         | 2.2                         | 1.48016    | 0.000137   | 83.8          |
| MO-2M                         | 69.4                        | 7.5                         | 2.7                         | 1.88472    | 0.000174   | 98.0          |
| MO-3M                         | 57.4                        | 6.3                         | 2.8                         | 1.61417    | 0.000149   | 82.7          |

S-selectivity, Y-yield, Tal-talose, Gul-gulose, Ido-idoose and CB-carbon balance. TON-turn over number is calculated as moles of reactant consumed per mole of catalyst. TOF-turn over frequency is calculated as moles of reactant consumed per mole of catalyst per unit time.

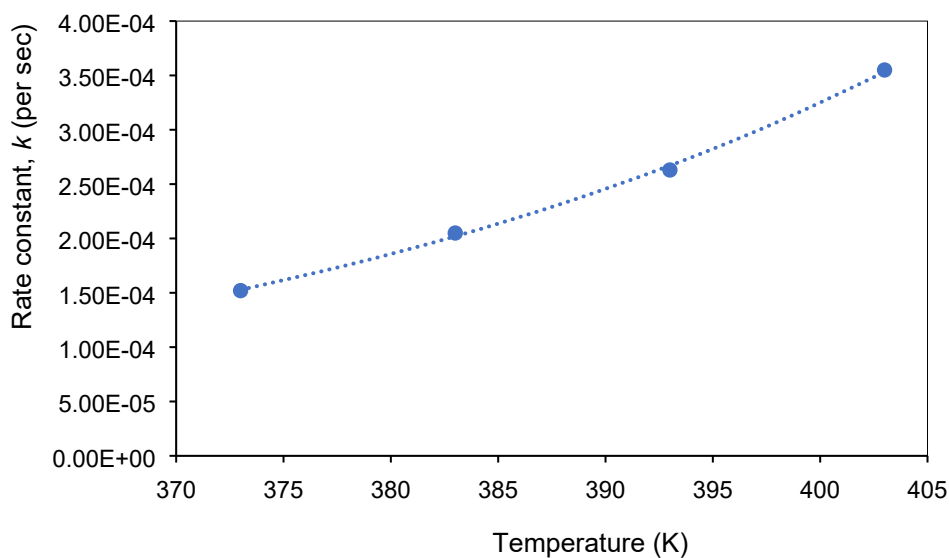

**Figure S12.** Correlation plot between first-order rate constant of galactose disappearance and temperature over acid treated MoO<sub>3</sub> (MO-2M) in a water medium at 15% wt. catalyst load on substrate.

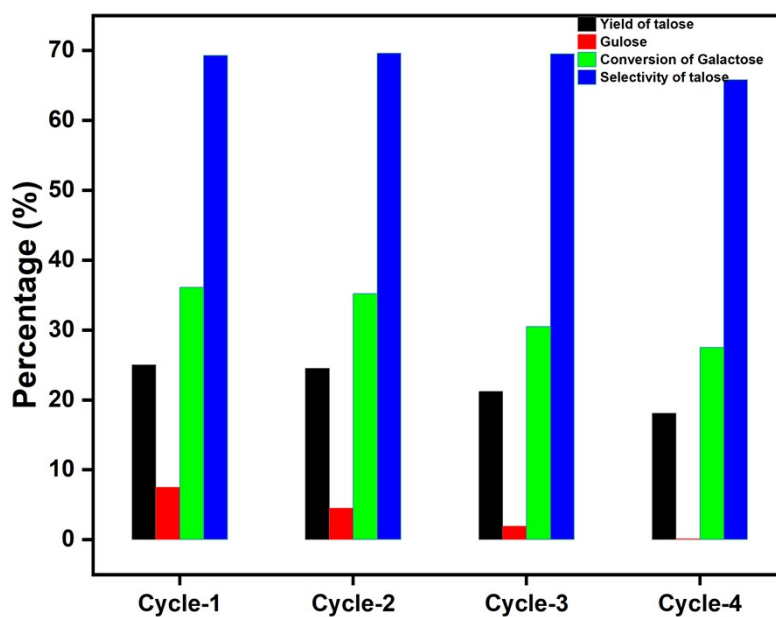

**Figure S13.** Recyclability result of MO-2M catalyst under optimum conditions in a water medium.

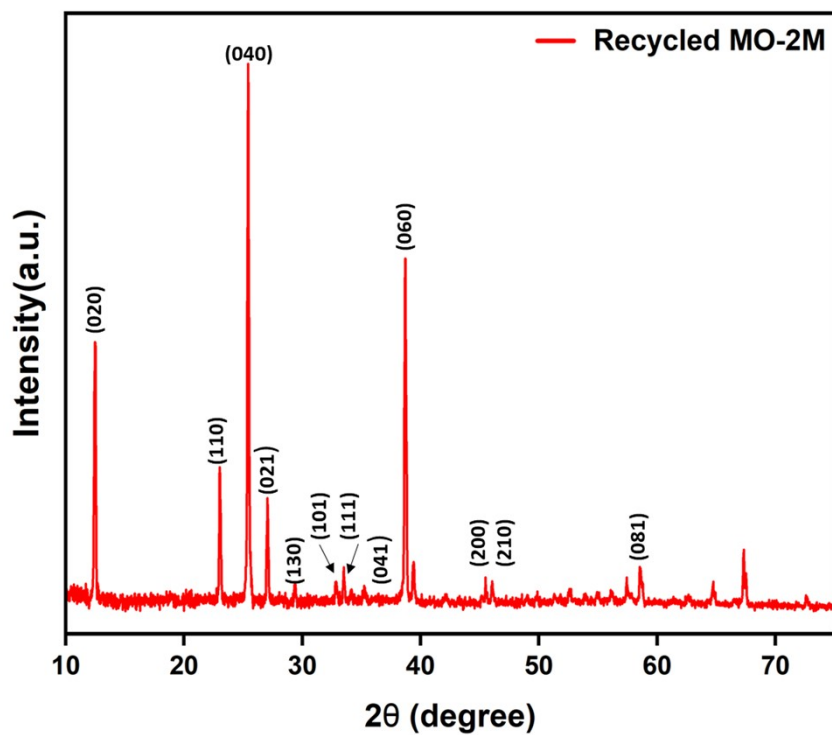

**Figure S14.** XRD pattern of recycled MO-2M catalyst after 4 runs.

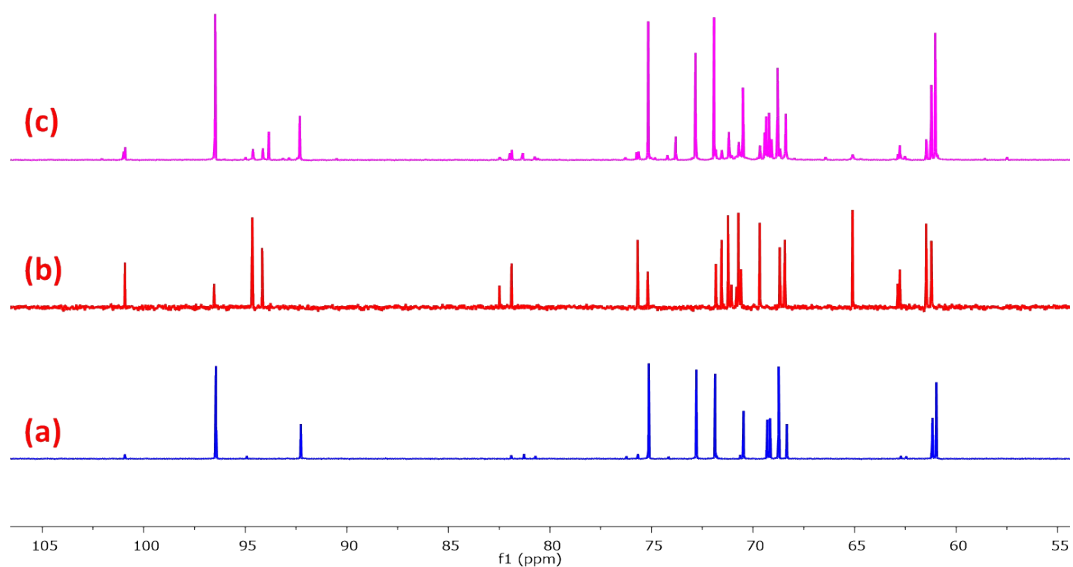

**Figure S15.**  $^{13}\text{C}$ -NMR characterization of galactose epimerization over MO-2M catalyst: (a) standard galactose, (b) standard talose and (c) post reaction mixture obtained using D-galactose as a substrate under optimum conditions.

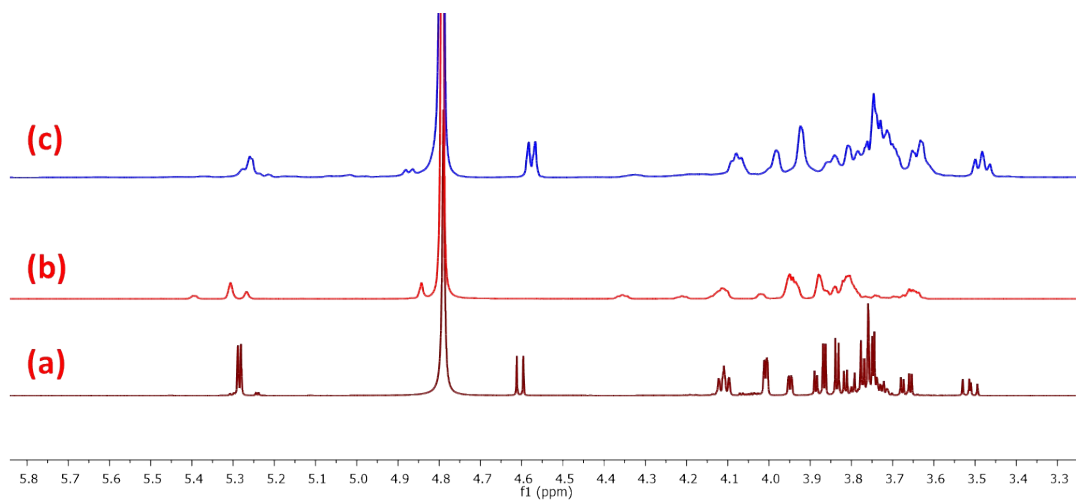

**Figure S16.**  $^1\text{H}$ -NMR characterization of galactose epimerization over MO-2M catalyst: (a) standard galactose, (b) standard talose and (c) post reaction mixture obtained using D-galactose as a substrate under optimum conditions.

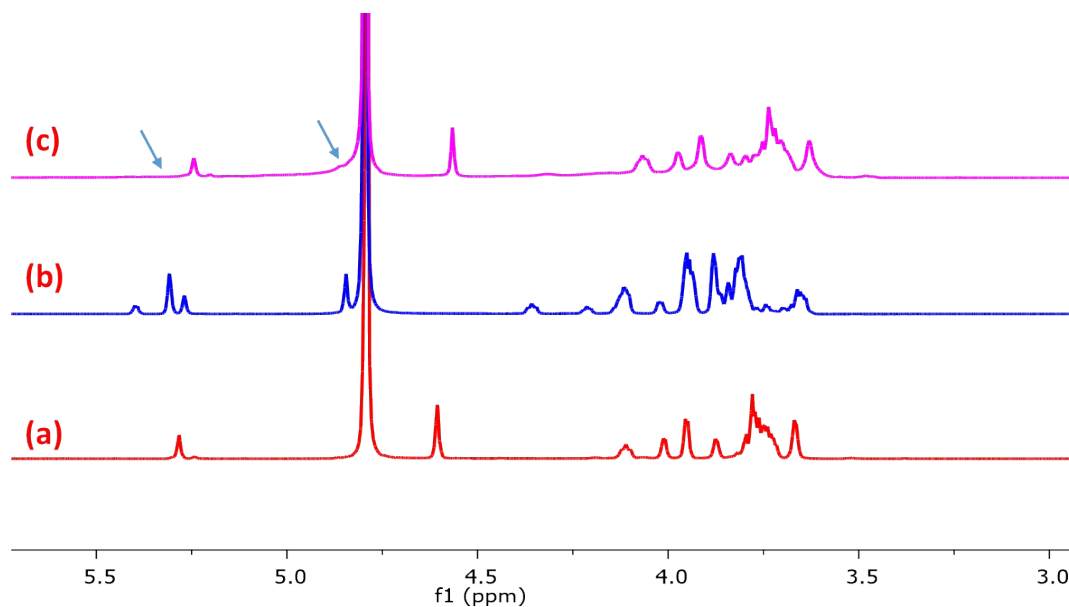

**Figure S17.** <sup>1</sup>H-NMR characterization of galactose epimerization over MO-2M catalyst; (a) standard D-(*d*<sup>2</sup>)-galactose, (b) standard talose and (c) post reaction mixture obtained using D-(*d*<sup>2</sup>)-galactose as a substrate under optimum conditions.
